# Supplementary material for: Molecular adaptations to phosphorus deprivation and comparison with nitrogen deprivation responses in the diatom Phaeodactylum tricornutum
Source: PubMed Central journal article supplement (PMC5825098; doi:10.1371/journal.pone.0193335), 2018-02-23
Supplement: pone.0193335.s005.pdf [file pone.0193335.s005.pdf]

HsPFKFB2 : MSGASSSEQNNNSYETKTPNLRMSEKKCSWASYMINSPTL : 40  
PtP2FK/F2BP1 : MSSINSIPASSSVSDLSSQRFPPFNIDNPMFHLRPEGENAAPLEVTTGTTASDKV--- : 57  
PtP2FK/F2BP2 : MSSIHSPSPSVNGRDHFQYHAEESPPPEPPSGLPETSPITVRKDYAAGSSSELATETPTVQR : 60

HsPFKFB2 : -----IVMIGLPARGKTYVSKKLTFRYLNWIGV-PTKVFNLGVYRREAVKS : 84  
PtP2FK/F2BP1 : -----IVMVGLPATGKTHIAKRICRFLSFFHDIPSQIFNVGDYRQLCGA : 102  
PtP2FK/F2BP2 : LEARRKLTKNSTRLVIALVGLPARGKSFVARKLLHYLNWSGV-QCKIFNVGRYRREAVYKH : 119

HsPFKFB2 : YKSY-----DFFRHDNBEAMKIRKOCALVALEDVKAYLTFENGQIAVFDATN : 131  
PtP2FK/F2BP1 : QMPA-----DFYDPSNBAGQLARHCACLAALADLLEYKQDGVVVAAFDATN : 149  
PtP2FK/F2BP2 : VAAA SADARAQTGACDADFFDAQNERAAELREKVADLALRDMLRCSNHER-IATFDATN : 178

HsPFKFB2 : TTRERRDMLLNFAEQNSFK-----VFFVESVCDDPDVIAANILEVKVSSPDYPERNREN : 185  
PtP2FK/F2BP1 : STKARRSHILOVLKASGLGCK----RMFVESVCDEHALLLEENIRKVKLSTPDYRDMPEQ : 205  
PtP2FK/F2BP2 : STDKRRKWLLOECTSPDKRPGKPTGVVFFVESICDDQELLEENIRYKISNSPDFDGMTQQE : 238

HsPFKFB2 : VMEDFLKRIECKVITYRPLDPDNYDKDLSFIKVINVGQRFVLRVQDYIQSKIYVYLMNI : 245  
PtP2FK/F2BP1 : AMRDEKTRREINVMRVYEPVD----ETDGPHIK-IINSKQFIVTNIIRGYLPLKVHVVMNI : 260  
PtP2FK/F2BP2 : ALSDLRKRVRTKYEEQYETIT----DDLSYMKVFNLSKLMVNIETVGRMAKELVPALMSW : 294

HsPFKFB2 : HVQPRTIYLCRXGESEFNLLGKIGGDSGLSVRCQFAQALRKFLEEQEITDLKVVTSQLK : 305  
PtP2FK/F2BP1 : HTLPRTEFYLRHQSEYNLLGKIGGDSGLTPAGLEYARRLAQFAQTHIGSQTVTNETTGE : 320  
PtP2FK/F2BP2 : HIGTRPVFLCRPGQTIISGILTDGEDYVARNKANHENEGPRDPFPMKIITSTMPRAADTVN : 354

HsPFKFB2 : RTIQTAESLGVPEYQ-----WKILNEIDAGV : 331  
PtP2FK/F2BP1 : SATVPRPARLWSTLRRTLETAQFINHEALQHTWDNGDSEAELQFRPMARRNLDELYACT : 380  
PtP2FK/F2BP2 : WIDYEFAIQQMS-----NLNPLDKGD : 375

HsPFKFB2 : CEEMTYAEIEKRYPEEFALRDQEKYL--YRYPGGESYQDLVORLEPVMELERQGNV-LV : 388  
PtP2FK/F2BP1 : CDGMTYKEIEQVYPEEFARRQDDKLS--YRYPGGESYMDVTLRLLEPIAQEMERTREPVLI : 438  
PtP2FK/F2BP2 : FACMELDEIRKKNESWYERLERNRYQTRYVFPGGESYADLVKRLTSVVVIDVEQVQVPTLTV : 435

HsPFKFB2 : ISHOAVMRCLLAYFLDKGADELPYLRCPLHTIFKLTTPVAYGCKVETIKLNVEAVNTHRDK : 448  
PtP2FK/F2BP1 : VGHQILRILLYAYFMGLDRNEAPYVSIPLNNVIELTPHAYGCHEKRFCLMRKEEMLNDGQ : 498  
PtP2FK/F2BP2 : VSHVSILQCLMSYERNTPVELCTGIEVPMHTVVVFETPVRRGGWSETHHPLFGADECKGM : 495

HsPFKFB2 : PTNFPKNQTPVRRMRNSFTPLSSSNTIRRPRIYSVGSRPLKPLSPLRAQDMQEGAD : 505  
PtP2FK/F2BP1 : DEPVTSMPVKINGGTSHREPGASTVRRPAYYAANDPVMNAPSC : 540  
PtP2FK/F2BP2 : I-PVASESEFSSQVTFSSGSDSPIWTDLVSSKSSSSLKRELSGSKQGSHTS----- : 544
